# Supplementary material for: Switching and Combining Device-Aided Therapies in Advanced Parkinson’s Disease: A Double Centre Retrospective Study
Source: Preprints.org preprint supplement (doi:10.20944/preprints202202.0065.v1), 2022-02-04
Supplement: Supplementary file 2 [file supplementary]

## Sheet: Suppl. Table 1
	Centre	Gender	Age at PD onset	PD duration at 1st DAT	Age at 1st DAT	Duration of 1st DAT before switch/add (years)	Global improvement from CGI after 1st DAT	Age at switch/add to 2nd DAT	Duration 2nd DAT up to June 2021 (years)	Global improvement from CGI after 2nd DAT	Duration 3rd DAT up to June 2021 (years) and reason for stop	Global imporvement from CGI after 3rd DAT	Current state/Outcome	Reasons of switch/add		Frequnecy of Motor causes	Frequency of Non-Motor Causes	Unilateral or bilateral STN-DBS
Single switch
I. LCIG to STN-DBS, N=7														Motor	Non-motor/ Other
1	UMCL	f	43	14	57	11	1	69	3	2	/	/	ongoing	Dyskinesias	Polyneuropathy, punding syndrome	1	2	/
2	UMCL	m	48	11	59	9	1	68	4	3	/	/	drop out due to infection	Dyskinesias, motor fluctuations	Sleep problems, sweating	2	2	/
3	UMCL	m	50	15	65	1	3	66	4	3	/	/	deceased	/	Weight loss, polyneuropathy	0	2	/
4	UMCL	m	45	10	55	4	3	59	2	1	/	/	ongoing	Motor fluctuations	Polyneuropathy	1	1	/
5	UMCL	m	41	28	69	4	3	73	3	2	/	/	ongoing	Freezing of gait, tremor, motor fluctuations	/	3	0	/
6	UMCL	m	50	10	60	3	3	63	8	1	/	/	ongoing	Dyskinesias	Weight loss	1	1	/
7	TASMC	f	29	9	38	6	1	44	3	1	/	/	ongoing	Dyskinesias	/	1	0	/
	Median (range)		45 (29-50)	11 (9-28)	59 (38-69)	4 (1-11)	3 (1-3)	66 (44-73)	3 (3-8)	2 (1-3)
II. LCIG to CSAI, N=1
1	TASMC	f	47	13	60	1	5	61	4	2	/	/	deceased	Dyskinesias	/	1	0	/
III. CSAI to STN-DBS, N=5
1	UMCL	m	52	8	60	1	2	61	2	1	/	/	ongoing	/	Planned "bridging therapy"	0	1	/
2	UMCL	f	43	8	51	1.5	2	54	2	3	/	/	ongoing	/	Planned "bridging therapy"	0	1	/
3	UMCL	m	36	8	44	1	2	39	9	1	/	/	ongoing	/	Day time sleepiness, nausea	0	2	/
4	UMCL	f	42	10	52	1	1	53	8	1	/	/	ongoing	OFF related respiratory dystonia, dyskinesias	Skin nodules at injection site	2	1	/
5	TASMC	f	52	13	65	2	2	67	1	1	/	/	ongoing	Disabling tremor not responsive to CSAI	/	1	0	/
	Median (range)		43 (36-52)	8 (8-13)	52 (44-65)	1 (1-2)	2 (1-2)	54 (39-67)	2 (1-9)	1 (1-3)
IV. CSAI to LCIG, N=8
1	UMCL	f	57	14	71	1	2	73	2	2	/	/	ongoing	Motor fluctuations	Psychosis	1	1	/
2	UMCL	m	66	8	74	2	2	77	2	2	/	/	ongoing	Dyskinesias	Skin nodules at injection site	1	1	/
3	UMCL	m	48	10	58	0.5	1	59	1	1	/	/	ongoing	Freezing of gait	Visual halucinations, sleepiness, fatigue	1	2	/
4	UMCL	f	50	20	70	0.7	1	71	4	3	/	/	deceased	/	Skin nodules at site	0	1	/
5	UMCL	m	51	19	70	0.5	3	71	0.5	1	/	/	ongoing	/	Skin necrosis at site, subjective cognitive complains	0	2	/
6	TASMC	m	62	7	69	5	3	74	3.5	2	/	/	ongoing	Motor fluctuations	/	1	0	/
7	TASMC	m	58	15	73	2	2	75	4	3	/	/	ongoing	Motor fluctuations	/	1	0	/
8	TASMC	f	54	10	64	2	3	66	5	3	/	/	ongoing	Motor fluctuations, OFF dystonia, dyskinesias	/	3	0	/
	Median (range)		55 (48-66)	12 (7-20)	70 (58-74)	1.5 (0.5-5)	2 (1-3)	72 (71-77)	2.75 (0.5-5)	2 (1-3)
V. STN-DBS to LCIG, N=1
1	TASMC	m	42	7	49	18	2	67	1	4	/	/	deceased	Motor fluctuations, dyskinesias	/	2	0	/
Double switch
VI. LCIG to CSAI to STN-DBS, N=1
1	UMCL	f	44	19	63	0.08	4	63	0.08	4	12	2	1. Dropout due to insuficient control of symptoms, 2. Dropout due to infection	Motor fluctuations, dyskinesias	Non-motor (autonomic) fluctuations	2	1	/
VII. STN-DBS to CSAI to LCIG, N=1
1	TASMC	m	52	7	59	0.5	6	59.5	2	4	5		1.Droput due to insuficent control of symptoms, 2. Deceased	Dystonia	Cognitive complains	1	1	Bilateral
Combined DATs
VIII. STN-DBS+LCIG, N=5
1	TASMC*	f	55	8	63	6	1	69	4	2	/	/	ongoing	Motor fluctuations	/	1	0	Unilateral
2	TASMC*	f	69	3	72	4	1	76	2	1	/	/	ongoing	Motor fluctuations, dyskinesias	/	2	0	Unilateral
3	TASMC*	m	52	6	58	9	1	67	0.08	2	/	/	1. Drop-out due to DDS. 2. Back to uni STN-DBS ongoing	Motor fluctuations	Dopamine dysregulation syndrome	1	1	Unilateral
4	TASMC	m	55	6	61	3	1	64	4	1	/	/	ongoing	Freezing of gait	/	1	0	Bilateral
5	TASMC	m	65	10	75	4	1	79	1	2	/	/	ongoing	Motor fluctuations	Dysphagia	1	0	Bilateral
	Median (range)		55 (52-69)	6 (3-10)	63 (58-72)	4 (3-9)	1 (1-1)	69 (64-79)	2 (0.08-4)	1.5 (1-2)
IX. STN-DBS+CSAI to STN-DBS+LCIG, N=1
1	TASMC	m	46	11	57	10	1	67	5	1	2		1. Poor control of symptoms, 2. Ongoing	Gait impairment, dystonia, motor fluctuations	/	3	0	Bilateral
